# Supplementary material
Source: Research Square preprint supplement (doi:10.21203/rs.3.rs-10025602/v1)
Supplement: Supplementary file 1 [file 1da6fa75207e80d513634c39.docx]

**S1 Table. Correlation coefficients among 11 indicators.**

|  | **Points** | **2PT%** | **3PT%** | **FT%** | **OREB** | **DREB** | **AST** | **Fouls** | **Turnovers** | **Steals** | **Blocks** |
| --- | --- | --- | --- | --- | --- | --- | --- | --- | --- | --- | --- |
| Points | 1 |  |  |  |  |  |  |  |  |  |  |
| 2PT% | .720** | 1 |  |  |  |  |  |  |  |  |  |
| 3PT% | .305 | .150 | 1 |  |  |  |  |  |  |  |  |
| FT% | .485* | .386 | -.040 | 1 |  |  |  |  |  |  |  |
| OREB | .550** | .235 | -.209 | .356 | 1 |  |  |  |  |  |  |
| DREB | .480* | .251 | -.228 | .228 | .075 | 1 |  |  |  |  |  |
| AST | .680** | .320 | .321 | .325 | .085 | .310 | 1 |  |  |  |  |
| PF | -.175 | -.099 | .285 | -.057 | -.069 | .357 | -.220 | 1 |  |  |  |
| TO | .065 | .060 | .291 | .051 | -.208 | .303 | -.231 | -.045 | 1 |  |  |
| STL | .001 | .125 | -.213 | -.226 | .338 | -.052 | .370 | .213 | -.138 | 1 |  |
| BLK | .249 | -.089 | .284 | .284 | -.124 | -.023 | -.079 | -.152 | -.097 | .500* | 1 |

**Note: * p < .05; ** p < .001. All data are sourced from official game statistics of the 2024 Paris Olympic Women's Basketball Tournament.*
