# Supplementary material
Source: Research Square preprint supplement (doi:10.21203/rs.3.rs-10025602/v1)
Supplement: Supplementary file 2 [file 4b6b3af727b9a2577918975b.docx]

**S3 Table. Standardized processing results of offensive and defensive technical indicators for the 2024 Paris Olympic Women's Basketball Tournament (selected matches).**

| **Matchup** | **Points** | **2PT%** | **3PT%** | **FT%** | **OREB** | **DREB** | **AST** | **Fouls** | **Turnovers** | **Steals** | **Blocks** |
| --- | --- | --- | --- | --- | --- | --- | --- | --- | --- | --- | --- |
| Spain vs China | 0.742 | 0.513 | 0.761 | 0.637 | 0.913 | 0.000 | 0.839 | 0.760 | 0.577 | 0.514 | 0.222 |
| Serbia vs Puerto Rico | 0.000 | 0.000 | 0.502 | 0.557 | 0.565 | 0.333 | 0.323 | 0.360 | 0.192 | 1.000 | 0.667 |
| Puerto Rico vs Spain | 0.345 | 0.638 | 0.000 | 0.643 | 0.348 | 0.276 | 0.194 | 0.792 | 0.423 | 0.257 | 0.100 |
| China vs Serbia | 0.448 | 0.276 | 1.000 | 0.594 | 0.652 | 0.224 | 0.355 | 0.500 | 0.577 | 0.257 | 0.200 |
| China vs Puerto Rico | 0.431 | 0.379 | 0.356 | 0.000 | 0.435 | 0.431 | 0.452 | 0.250 | 0.654 | 0.114 | 0.200 |
| Serbia vs Spain | 0.397 | 0.638 | 0.079 | 0.898 | 0.391 | 0.191 | 0.516 | 0.500 | 0.115 | 0.772 | 0.300 |
| Nigeria vs Australia | 0.448 | 0.224 | 0.624 | 0.248 | 0.565 | 0.345 | 0.387 | 0.375 | 0.039 | 0.686 | 0.501 |
| Canada vs France | 0.397 | 0.414 | 0.257 | 0.475 | 0.609 | 0.207 | 0.323 | 0.542 | 0.115 | 0.343 | 0.801 |
| Australia vs Canada | 0.414 | 0.259 | 0.941 | 0.430 | 0.435 | 0.207 | 0.516 | 0.458 | 0.078 | 0.600 | 0.801 |
| France vs Nigeria | 0.397 | 0.534 | 0.337 | 0.281 | 0.435 | 0.191 | 0.323 | 0.875 | 0.000 | 0.629 | 0.300 |
| Canada vs Nigeria | 0.517 | 0.466 | 0.337 | 0.562 | 1.000 | 0.069 | 0.194 | 0.333 | 0.000 | 0.629 | 0.501 |
| Australia vs France | 0.534 | 0.879 | 0.485 | 0.652 | 0.261 | 0.121 | 0.387 | 0.833 | 0.346 | 0.486 | 0.601 |
| Germany vs Belgium | 0.552 | 0.672 | 0.752 | 0.463 | 0.000 | 0.241 | 0.452 | 0.458 | 0.078 | 0.600 | 0.601 |
| USA vs Japan | 0.724 | 0.612 | 0.356 | 0.720 | 0.783 | 0.241 | 0.871 | 0.708 | 0.423 | 0.314 | 1.000 |
| Japan vs Germany | 0.448 | 0.293 | 0.381 | 0.580 | 0.609 | 0.328 | 0.452 | 0.250 | 0.192 | 0.200 | 0.200 |
| Belgium vs USA | 0.586 | 0.603 | 0.267 | 0.921 | 0.609 | 0.224 | 0.710 | 0.542 | 0.346 | 0.429 | 0.901 |
| Japan vs Belgium | 0.466 | 0.517 | 0.416 | 0.687 | 0.609 | 0.224 | 0.645 | 0.750 | 0.385 | 0.457 | 0.701 |
| Germany vs USA | 0.552 | 0.500 | 0.812 | 0.637 | 0.130 | 0.379 | 0.419 | 0.958 | 0.115 | 0.600 | 0.701 |
| Serbia vs Australia | 0.552 | 0.500 | 0.535 | 0.475 | 0.391 | 0.276 | 0.516 | 0.333 | 0.078 | 0.686 | 0.400 |
| Spain vs Belgium | 0.483 | 0.379 | 0.931 | 0.523 | 0.609 | 0.207 | 0.645 | 0.667 | 0.000 | 0.600 | 0.701 |
| Germany vs France | 0.552 | 0.397 | 0.574 | 0.844 | 0.609 | 0.086 | 0.290 | 0.292 | 0.154 | 0.572 | 0.701 |
| Nigeria vs USA | 0.569 | 0.879 | 0.188 | 0.540 | 0.348 | 0.224 | 0.710 | 0.542 | 0.346 | 0.314 | 0.400 |
| USA vs Australia | 0.466 | 0.517 | 0.490 | 0.983 | 0.217 | 0.431 | 0.677 | 0.958 | 0.500 | 0.457 | 0.801 |
| France vs Belgium | 0.569 | 0.362 | 0.267 | 0.810 | 0.739 | 0.328 | 0.581 | 0.000 | 0.078 | 0.514 | 0.501 |
| Belgium vs Australia | 0.603 | 0.534 | 0.693 | 0.672 | 0.348 | 0.276 | 0.548 | 0.833 | 0.615 | 0.372 | 0.901 |
| France vs USA | 0.397 | 0.276 | 0.000 | 1.000 | 1.000 | 0.241 | 0.258 | 0.417 | 0.192 | 0.543 | 0.701 |

*Note: All data are sourced from the 2024 Paris Olympic Women's Basketball Tournament matches collected for this study and do not involve data from other competitions.*
