# Supplementary material
Source: Research Square preprint supplement (doi:10.21203/rs.3.rs-10025602/v1)
Supplement: Supplementary file 3 [file c90d6a0166b3c0213bfdde75.docx]

**S2 Table. Raw data of offensive and defensive technical indicators for the 2024 Paris Olympic Women's Basketball Tournament (selected matches).**

| **Matchup** | **Points** | **2PT%** | **3PT%** | **FT%** | **OREB** | **DREB** | **AST** | **Fouls** | **Turnovers** | **Steals** | **Blocks** |
| --- | --- | --- | --- | --- | --- | --- | --- | --- | --- | --- | --- |
| Spain vs China | 179 | 0.475 | 0.375 | 0.776 | 30 | 45 | 53 | 42 | 31 | 20 | 4 |
| Serbia vs Puerto Rico | 113 | 0.337 | 0.306 | 0.75 | 22 | 64 | 37 | 32 | 37 | 37 | 8 |
| Puerto Rico vs Spain | 125 | 0.527 | 0.196 | 0.792 | 18 | 57 | 33 | 28 | 24 | 11 | 2 |
| China vs Serbia | 140 | 0.411 | 0.436 | 0.766 | 25 | 54 | 36 | 36 | 21 | 11 | 3 |
| China vs Puerto Rico | 138 | 0.443 | 0.293 | 0.566 | 20 | 66 | 40 | 42 | 19 | 8 | 3 |
| Serbia vs Spain | 132 | 0.524 | 0.225 | 0.868 | 19 | 52 | 42 | 36 | 39 | 27 | 4 |
| Nigeria vs Australia | 137 | 0.393 | 0.34 | 0.651 | 23 | 61 | 38 | 39 | 41 | 24 | 6 |
| Canada vs France | 129 | 0.454 | 0.268 | 0.725 | 24 | 53 | 34 | 35 | 35 | 14 | 9 |
| Australia vs Canada | 135 | 0.406 | 0.434 | 0.709 | 20 | 53 | 42 | 37 | 36 | 21 | 9 |
| France vs Nigeria | 129 | 0.489 | 0.287 | 0.661 | 20 | 52 | 34 | 27 | 38 | 22 | 4 |
| Canada vs Nigeria | 149 | 0.47 | 0.289 | 0.753 | 33 | 45 | 27 | 40 | 45 | 22 | 6 |
| Australia vs France | 151 | 0.595 | 0.325 | 0.783 | 15 | 48 | 38 | 28 | 29 | 17 | 7 |
| Germany vs Belgium | 152 | 0.538 | 0.389 | 0.721 | 9 | 55 | 40 | 37 | 36 | 21 | 7 |
| USA vs Japan | 178 | 0.519 | 0.293 | 0.806 | 28 | 55 | 58 | 31 | 24 | 12 | 11 |
| Japan vs Germany | 139 | 0.417 | 0.3 | 0.759 | 22 | 60 | 41 | 42 | 33 | 10 | 3 |
| Belgium vs USA | 161 | 0.515 | 0.271 | 0.873 | 22 | 54 | 48 | 35 | 29 | 15 | 10 |
| Japan vs Belgium | 143 | 0.485 | 0.309 | 0.795 | 23 | 54 | 46 | 30 | 28 | 16 | 8 |
| Germany vs USA | 155 | 0.484 | 0.407 | 0.778 | 11 | 63 | 39 | 23 | 39 | 21 | 8 |
| Serbia vs Australia | 152 | 0.481 | 0.339 | 0.726 | 19 | 57 | 42 | 40 | 36 | 24 | 5 |
| Spain vs Belgium | 145 | 0.441 | 0.432 | 0.75 | 22 | 53 | 46 | 32 | 38 | 21 | 8 |
| Germany vs France | 155 | 0.451 | 0.347 | 0.846 | 23 | 46 | 31 | 41 | 34 | 20 | 8 |
| Nigeria vs USA | 162 | 0.6 | 0.251 | 0.747 | 18 | 54 | 48 | 35 | 29 | 12 | 5 |
| USA vs Australia | 149 | 0.49 | 0.327 | 0.892 | 14 | 66 | 47 | 23 | 25 | 16 | 9 |
| France vs Belgium | 156 | 0.44 | 0.263 | 0.834 | 26 | 60 | 45 | 48 | 36 | 18 | 6 |
| Belgium vs Australia | 166 | 0.495 | 0.379 | 0.79 | 18 | 57 | 43 | 28 | 20 | 13 | 10 |
| France vs USA | 133 | 0.409 | 0.181 | 0.897 | 32 | 55 | 30 | 38 | 33 | 19 | 8 |

*Note: All data are sourced from the 2024 Paris Olympic Women's Basketball Tournament matches collected for this study and do not involve data from other competitions.*
